# Supplementary material
Source: MDPI journal article supplement (https://www.mdpi.com/search?q=applsci-10-03468)
Supplement: s001 [file applsci-10-03468-s001.pdf]

Table 1A The levels of LOD (limit of detection) and LOQ (limit of quantification) for all compounds used in experiment.

| compound                          | LOD<br>mg 100 g <sup>-1</sup> | LOQ<br>mg 100 g <sup>-1</sup> |
|-----------------------------------|-------------------------------|-------------------------------|
| lutein                            | 0.24                          | 0.72                          |
| zeaxanthin                        | 0.50                          | 1.50                          |
| beta-carotene                     | 4.00                          | 12.00                         |
|                                   |                               |                               |
| gallic acid                       | 99.56                         | 298.67                        |
| chlorogenic acid                  | 0.40                          | 1.20                          |
| caffeic acid                      | 0.40                          | 1.20                          |
| <i>p</i> -coumaric acid           | 4.00                          | 12.00                         |
| ferulic acid                      | 1.20                          | 3.60                          |
|                                   |                               |                               |
| quercetin-3- <i>O</i> -glucoside  | 17.54                         | 52.63                         |
| kaempferol-3- <i>O</i> -glucoside | 1.75                          | 5.26                          |
| myricetin                         | 0.89                          | 2.67                          |
| quercetin                         | 2.11                          | 6.32                          |
| quercetin-3- <i>O</i> -rutinoside | 1.40                          | 4.21                          |
| apigenin                          | 2.22                          | 6.67                          |
| kaempferol                        | 1.33                          | 4.00                          |
|                                   |                               |                               |
| chlorophyll a                     | 4.67                          | 14.00                         |
| chlorophyll b                     | 14.20                         | 42.60                         |

Table 2A. The concentration of individual bioactive compounds ( in mg 100 g<sup>-1</sup> of product ) in selected herbs from organic and conventional production in 2017, mean values ±standard error

| bioactive compounds/experimental combination | basil         |              | bear's garlic |               | marjoram      |               | oregano       |              | p-value |
|----------------------------------------------|---------------|--------------|---------------|---------------|---------------|---------------|---------------|--------------|---------|
|                                              | organic       | conventional | organic       | conventional  | organic       | conventional  | organic       | conventional |         |
| total polyphenols                            | 1259.9±28.3 c | 742.7±78.8 d | 1791.1±19.8 b | 1754.2±46.2 b | 995.8±22.2 d  | 1222.9±26.5 c | 3032.7±35.1 a | 980.2±11.4 d | <0.0001 |
| total phenolic acids                         | 388.8±32.1 c  | 327.5±11.8 c | 1332.0±26.6 a | 1251.4±48.6 a | 467.2±21.6 c  | 507.7±15.8 b  | 754.1±21.5 b  | 437.8±4.3 c  | <0.0001 |
| gallic acid                                  | 354.9±1.9 c   | 304.8±13.7 c | 1227.8±26.3 a | 1088.2±50.2 a | 375.1±22.4 cb | 431.8±15.2b   | 695.6±20.8 b  | 347.4±1.4 bc | 0.0001  |
| chlorogenic acid                             | 4.1±0.3 c     | 0.8±0.0 c    | 101.4±0.3 a   | 157.4±2.5 a   | 1.3±0.1 c     | 1.3±0.1 c     | 8.3±0.1 b     | 8.4±0.7 b    | <0.0001 |
| caffeic acid                                 | 2.4±0.1d d    | 2.6±0.2 d    | 2.8±0.1 d     | 5.9±0.3 c     | 8.5±0.2 b     | 9.6±0.1 a     | 2.0±0.1 d     | 10.1±1.2 a   | <0.0001 |
| p-coumaric acid                              | 20.8±0.3 d    | 14.7±1.2 d   | N.D.          | N.D.          | 61.9±0.7 a    | 48.9±1.5 b    | 36.3±2.4 c    | 54.1±1.3 a   | <0.0001 |
| ferulic acid                                 | 6.7±0.1 c     | 4.6±0.4 c    | N.D.          | N.D.          | 20.4±0.2 a    | 16.0±0.5 ab   | 11.8±0.8 b    | 17.7±0.4 a   | <0.0001 |
| total flavonoids                             | 871.1±5.5 b   | 415.2±67.6 d | 459.2±6.9 d   | 502.8±11.7 c  | 528.6±0.8 c   | 715.2±14.1 b  | 2278.6±13.6 a | 542.4±15.5 c | <0.0001 |
| quercetin-3-O-rutinoside                     | 9.1±0.1 c     | 12.2±0.8 b   | N.D.          | N.D.          | 10.5±0.4 b    | 21.2±0.7 a    | 8.9±0.3 c     | 19.4±0.2 a   | <0.0001 |
| kaempferol-3-O-glucoside                     | 6.4±0.6 d     | N.D.         | N.D.          | N.D.          | 11.9±0.2 c    | 321.0±2.3 a   | 160.2±8.2 b   | N.D.         | <0.0001 |
| myricetin                                    | N.D.          | N.D.         | N.D.          | N.D.          | 116.0±1.3 a   | 6.9±0.5 c     | 48.3±0.3 b    | 103.6±0.3 a  | <0.0001 |
| quercetin                                    | 7.2±0.1 d     | 14.9±0.5 c   | 32.5±0.7 a    | 23.1±0.6 b    | 6.9±0.1 e     | 39.3±0.5 a    | 15.9±0.1 c    | 24.1±6.0 b   | 0.0008  |
| quercetin-3-O-glucoside                      | 824.6±5.7 b   | 359.9±61.0 d | 356.8±6.5 d   | 427.4±10.2 c  | 356.1±1.1 d   | 324.5±11.0 d  | 2000.7±11.1 a | 365.2±21.2 d | <0.0001 |
| apigenin                                     | N.D.          | N.D.         | 69.8±0.4 a    | 52.3±0.9 b    | N.D.          | N.D.          | N.D.          | N.D.         | <0.0001 |
| kaempferol                                   | 23.8±0.4 b    | 25.0±0.4 b   | N.D.          | N.D.          | 27.3±0.01b    | N.D.          | 44.5±0.4 a    | 27.9±0.4 b   | <0.0001 |
| total carotenoids                            | 23.0±0.3 c    | 38.2±0.3 a   | 24.8±0.2 c    | 27.7±2.6b     | 24.0±0.5c     | 40.6±0.3 a    | 23.1±1.1 c    | 23.4±0.4 c   | <0.0001 |
| lutein                                       | 8.4±0.01 d    | 9.3±0.01 c   | 17.8±0.01 a   | 8.8±0.01b     | 9.7±0.01c     | 8.4±0.01 d    | 10.7±0.02 b   | 7.7±0.01 e   | <0.0001 |
| zeaxanthin                                   | 1.7±0.01 a    | 1.7±0.02 a   | 1.9±0.01 a    | 1.6±0.01a     | 1.9±0.01a     | 1.7±0.01 a    | 1.7±0.01 a    | 1.2±0.01 b   | 0.024   |
| bata-carotene                                | 12.8±0.1 e    | 12.9±0.1 e   | 18.5±0.1 b    | 30.1±2.3a     | 13.2±0.3d     | 13.1±0.2 d    | 15.3±0.6 b    | 14.5±0.3 c   | <0.0001 |
| total chlorophylls                           | 58.0±4.1 f    | 83.2±4.7 e   | 204.6±9.3b    | 505.2±46.1a   | 120.5±5.8c    | 91.6±4.5 d    | 96.7±12.5 d   | 56.3±3.0 f   | <0.0001 |
| chlorophyll b                                | 38.6±3.8 e    | 62.2±3.8 d   | 147.7±2.6 b   | 347.6±31.1a   | 83.7±5.3c     | 65.5±2.6 d    | 63.5±8.6 d    | 38.1±2.3 e   | <0.0001 |
| chlorophyll a                                | 19.5±0.9 e    | 21.0±0.9 d   | 56.96.8 b     | 157.6±15.0a   | 36.8±1.0c     | 26.2±0.5 d    | 33.2±3.9 c    | 18.2±0.7 f   | <0.0001 |

Data are presented as the mean ± SE with ANOVA p-value; Means in rows followed by the same letter are not significantly different at the 5% level of probability (p<0.05); N.S. not significant; (n) number of samples (replications), n=3 (species), n=3 (system); N.D. not detected (below LOD/LOQ)

Table 3A. The concentration of individual bioactive compounds ( in mg 100 g<sup>-1</sup> of product ) in selected herbs from organic and conventional production in 2018, mean values  $\pm$ standard error

|                          | basil               |                    | bear's garlic       |                     | marjoram            |                     | oregano             |                    | p-value |
|--------------------------|---------------------|--------------------|---------------------|---------------------|---------------------|---------------------|---------------------|--------------------|---------|
|                          | conventional        | organic            | conventional        | organic             | conventional        | organic             | conventional        | organic            |         |
| total polyphenols        | 1255.7 $\pm$ 33.4 c | 762.0 $\pm$ 78.0 e | 1996.8 $\pm$ 24.1 b | 1939.6 $\pm$ 53.4 b | 1022.8 $\pm$ 25.6 d | 1267.1 $\pm$ 27.4 c | 3009.3 $\pm$ 37.8 a | 1003.6 $\pm$ 9.1 d | <0.0001 |
| total phenolic acids     | 436.7 $\pm$ 36.8 d  | 368.2 $\pm$ 14.2 e | 1528.8 $\pm$ 30.5 a | 1436.6 $\pm$ 55.8 a | 507.2 $\pm$ 25.0 c  | 559.3 $\pm$ 17.9 c  | 848.9 $\pm$ 24.3 b  | 476.8 $\pm$ 4.1 d  | 0.0002  |
| gallic acid              | 407.1 $\pm$ 36.6 c  | 349.6 $\pm$ 15.7 d | 1408.4 $\pm$ 30.2 a | 1248.2 $\pm$ 57.6 a | 430.3 $\pm$ 25.7 c  | 495.3 $\pm$ 17.5 c  | 798.0 $\pm$ 23.9 b  | 398.5 $\pm$ 1.6 cd | 0.0001  |
| chlorogenic acid         | 4.6 $\pm$ 0.4 c     | N.D.               | 117.6 $\pm$ 0.4 a   | 182.6 $\pm$ 2.9 a   | 1.4 $\pm$ 0.0 d     | 1.4 $\pm$ 0.0 d     | 9.5 $\pm$ 0.1 b     | 9.6 $\pm$ 0.8 b    | <0.0001 |
| caffeic acid             | 2.4 $\pm$ 0.1d d    | 2.5 $\pm$ 0.2 d    | 2.7 $\pm$ 0.1 d     | 5.8 $\pm$ 0.3 c     | 8.4 $\pm$ 0.2 b     | 9.5 $\pm$ 0.0 a     | 2.0 $\pm$ 0.0 d     | 10.0 $\pm$ 1.2 a   | <0.0001 |
| p-coumaric acid          | 17.2 $\pm$ 0.2 d    | 12.2 $\pm$ 1.0 d   | N.D.                | N.D.                | 50.6 $\pm$ 0.6 a    | 40.0 $\pm$ 1.2 b    | 29.8 $\pm$ 2.0 c    | 44.2 $\pm$ 1.0 b   | <0.0001 |
| ferulic acid             | 5.5 $\pm$ 0.1 d     | 3.8 $\pm$ 0.3 e    | N.D.                | N.D.                | 16.6 $\pm$ 0.2 a    | 13.1 $\pm$ 0.4 b    | 9.6 $\pm$ 0.7 c     | 14.5 $\pm$ 0.3 ab  | <0.0001 |
| total flavonoids         | 819.0 $\pm$ 5.1 b   | 393.8 $\pm$ 64.6 e | 468.0 $\pm$ 6.6 d   | 503.0 $\pm$ 11.1 c  | 515.6 $\pm$ 0.7 c   | 707.8 $\pm$ 13.3 b  | 2160.4 $\pm$ 13.4 a | 526.8 $\pm$ 13.1 c | <0.0001 |
| quercetin-3-O-rutinoside | 7.3 $\pm$ 0.1 c     | 9.8 $\pm$ 0.7 b    | N.D.                | N.D.                | 8.4 $\pm$ 0.3 c     | 17.1 $\pm$ 0.6 a    | 7.1 $\pm$ 0.2 c     | 15.6 $\pm$ 0.0 a   | <0.0001 |
| kaempferol-3-O-glucoside | 6.7 $\pm$ 0.6       | N.D.               | N.D.                | N.D.                | 12.5 $\pm$ 0.2 c    | 336.5 $\pm$ 2.4 a   | 168.0 $\pm$ 8.6 b   | N.D.               | <0.0001 |
| myricetin                | N.D.                | N.D.               | 13.9 $\pm$ 0.3 d    | 3.2 $\pm$ 0.0 e     | 120.6 $\pm$ 1.4 a   | 7.0 $\pm$ 0.5 d     | 50.2 $\pm$ 0.3 c    | 107.8 $\pm$ 0.3 b  | <0.0001 |
| quercetin                | 8.2 $\pm$ 0.1 d     | 17.2 $\pm$ 0.7 c   | 37.9 $\pm$ 0.8 a    | 26.9 $\pm$ 0.7 b    | 7.9 $\pm$ 0.2 d     | 45.8 $\pm$ 0.6 a    | 18.4 $\pm$ 0.1 c    | 28.0 $\pm$ 7.0 b   | 0.0008  |
| quercetin-3-O-glucoside  | 765.9 $\pm$ 5.3 b   | 334.3 $\pm$ 56.6 d | 331.4 $\pm$ 6.0 d   | 396.9 $\pm$ 9.5 c   | 330.7 $\pm$ 1.1 d   | 301.4 $\pm$ 10.2 e  | 1858.4 $\pm$ 10.3 a | 339.2 $\pm$ 19.7 d | <0.0001 |
| apigenin                 | N.D.                | N.D.               | 79.1 $\pm$ 0.4 a    | 59.2 $\pm$ 1.0 b    | N.D.                | N.D.                | N.D.                | N.D.               | <0.0001 |
| kaempferol               | 31.0 $\pm$ 0.5 b    | 32.6 $\pm$ 0.6 b   | 5.8 $\pm$ 0.1 d     | 16.8 $\pm$ 0.1 c    | 35.5 $\pm$ 0.0 b    | N.D.                | 58.3 $\pm$ 0.5 a    | 36.3 $\pm$ 0.5 b   | <0.0001 |
| total carotenoids        | 23.6 $\pm$ 0.4 c    | 41.3 $\pm$ 0.2 b   | 25.8 $\pm$ 0.6 c    | 29.1 $\pm$ 1.2 b    | 24.9 $\pm$ 0.3 c    | 42.9 $\pm$ 2.8 a    | 23.9 $\pm$ 0.3 c    | 24.1 $\pm$ 0.4 c   | <0.0001 |
| lutein                   | 9.0 $\pm$ 0.2c      | 10.1 $\pm$ 0.2 b   | 20.3 $\pm$ 0.2 a    | 9.5 $\pm$ 0.3 c     | 10.5 $\pm$ 0.3 b    | 9.0 $\pm$ 0.1 c     | 11.8 $\pm$ 0.4 b    | 8.1 $\pm$ 0.2 d    | <0.0001 |
| zeaxanthin               | 1.7 $\pm$ 0.01 a    | 1.9 $\pm$ 0.01 a   | 1.8 $\pm$ 0.01 a    | 1.6 $\pm$ 0.01a     | 1.7 $\pm$ 0.01 a    | 1.6 $\pm$ 0.01 a    | 1.7 $\pm$ 0.01 a    | 1.2 $\pm$ 0.01b    | 0.027   |
| bata-carotene            | 13.0 $\pm$ 0.1 d    | 13.1 $\pm$ 0.1 d   | 19.1 $\pm$ 0.2 b    | 31.8 $\pm$ 2.5a     | 13.4 $\pm$ 0.3 d    | 13.2 $\pm$ 0.2 d    | 15.6 $\pm$ 0.7 c    | 14.8 $\pm$ 0.3d    | <0.0001 |
| total chlorophylls       | 53.2 $\pm$ 3.5 d    | 74.3 $\pm$ 4.1 c   | 181.6 $\pm$ 8.9b    | 448.7 $\pm$ 40.9a   | 108.1 $\pm$ 5.0 bc  | 82.3 $\pm$ 4.1 c    | 87.6 $\pm$ 11.1 c   | 51.4 $\pm$ 2.6d    | <0.0001 |
| chlorophyll b            | 33.8 $\pm$ 3.1 e    | 53.5 $\pm$ 3.2 d   | 125.1 $\pm$ 2.1 b   | 292.3 $\pm$ 26.0a   | 71.5 $\pm$ 4.5 c    | 56.2 $\pm$ 2.2 d    | 54.7 $\pm$ 7.2d     | 33.3 $\pm$ 1.9e    | <0.0001 |
| chlorophyll a            | 19.4 $\pm$ 0.9 d    | 20.8 $\pm$ 0.9 cd  | 56.5 $\pm$ 6.7 b    | 156.4 $\pm$ 14.9a   | 36.6 $\pm$ 1.0 b    | 26.0 $\pm$ 2.0 c    | 33.0 $\pm$ 3.9 b    | 18.1 $\pm$ 0.7e    | <0.0001 |

Data are presented as the mean  $\pm$  SE with ANOVA p-value; Means in rows followed by the same letter are not significantly different at the 5% level of probability ( $p < 0.05$ ); N.S. not significant; (n) number of samples (replications), n=3 (species), n=3 (system); N.D. not detected (below LOD/LOQ)
